# Supplementary material for: Structure of the pre-mRNA leakage 39-kDa protein reveals a single domain of integrated zf-C3HC and Rsm1 modules
Source: PubMed Central journal article supplement (PMC9586977; doi:10.1038/s41598-022-22183-3), 2022-10-21
Supplement: 41598_2022_22183_MOESM1_ESM.pdf [file 41598_2022_22183_MOESM1_ESM.pdf]

## Figure S1. Alignment of *Saccharomycetaceae* Pml39 sequences.

Strict identity is indicated by a red box with a white character and similarity is indicated by a red character. Key residues are highlighted by colored boxes according to Fig. 2. Uniprot (<https://www.uniprot.org/>) accession codes: Q03760|PML39\_YEAST Pre-mRNA leakage protein 39 *S. cerevisiae* (strain ATCC 204508 / S288c), Uniprot: G2WJU9|YEASK K7\_Pml39p *S. cerevisiae* (strain Kyokai no. 7 / NBRC 101557), Uniprot: B3LLF2|YEAS1 Nuclear pore-associated protein *S. cerevisiae* (strain RM11-1a), Uniprot: C8ZE95|YEAS8 Pml39p *S. cerevisiae* (strain Lalvin EC1118 / Prise de mousse), Uniprot: B5VP24|YEAS6 YML107Cp-like protein *S. cerevisiae* (strain AWRI1631) , Uniprot: N1P0C9|Pml39p *S. cerevisiae* (strain CEN.PK113-7D), Uniprot: H0GLN8|SACCK Pml39p *S. cerevisiae* x *Saccharomyces kudriavzevii* (strain VIN7), Uniprot: A0A0L8VK67|9SACH PML39p Protein required for nuclear retention of unspliced pre-mRNAs *S. sp. 'boulardii'* , Uniprot: A6ZLV7|YEAS7 Conserved protein *S. cerevisiae* (strain YJM789), Uniprot: C7GV89| YEAS2 Pml39p *S. cerevisiae* (strain JAY291), Uniprot: A0A0L8RCS9| SACEU PML39-like protein *S. eubayanus*, Uniprot: J8Q1F3|SACAR YML107C *S. arboricola* (strain H-6 / AS 2.3317 / CBS 10644), Uniprot: H0GYW7| SACCK Pml39p *S. cerevisiae* x *Saccharomyces kudriavzevii* (strain VIN7), Uniprot: G8ZNK4| TORDC Uncharacterized protein *Torulasporea delbrueckii* (strain ATCC 10662 / CBS 1146 / NBRC 0425 / NCYC 2629 / NRRL Y-866), Uniprot: S6E752| ZYGB2 ZYBA0S04-07140g1\_1 *Zygosaccharomyces bailii* (strain CLIB 213 / ATCC 58445 / CBS 680 / CCRC 21525 / NBRC 1098 / NCYC 1416 / NRRL Y-2227), Uniprot: A0A1S7HBT7|9SACH PML39 (YML107C) *Zygosaccharomyces parabaillii*, Uniprot: A0A212MFH5|ZYGBA Uncharacterized protein *Zygosaccharomyces bailii*, Uniprot: G0WF17|NAUDC Uncharacterized protein *Naumovozyma dairenensis* (strain ATCC 10597 / BCRC 20456 / CBS 421 / NBRC 0211 / NRRL Y-12639). 75% consensus sequence is shown on the bottom.

## Figure S2. Sequence and structure alignment of canonical BIR domains.

**a)** For each BIR domain, the sequences are referred to by their NCBI databank ID (<https://www.ncbi.nlm.nih.gov/protein>) and the number of the BIR domain if multiple BIR domains are present. Key residues are colored according to Fig. 2. The secondary structure of the BIR1 domain of neuronal apoptosis inhibitory protein (U: Q13075, PDB: 2VM5) is shown on top. The protein names and Uniprot (U) or GenBank (GB) accession codes are as follows: neuronal apoptosis inhibitory protein BIR1 (U: Q13075), neuronal apoptosis inhibitory protein BIR2 (U: Q13075), Baculoviral IAP repeat-containing protein 3 BIR3 (U: Q13489.2), Inhibitor of apoptosis protein BIR1 (U: Q90660.1), E3 ubiquitin-protein ligase XIAP BIR1 (U: P98170.2), Apoptosis 1 inhibitor (Drosophila Inhibitor of Apoptosis 1, dIAP1) (Thread protein) BIR1 (U: Q24306, PDB: 3SIP), Apoptosis inhibitor IAP BIR1 (U: P41436.1), E3 ubiquitin-protein ligase IAP-3 BIR1 (U: P41437.1), Death-associated inhibitor of apoptosis 2 BIR1 (U: Q24307.3), apoptosis inhibitor survivin (U: O15392, GB: AAC51660.1, PDB: 3UED), neuronal apoptosis inhibitory protein bir3 (U: Q13075), Apoptosis inhibitor IAP BIR2 (U: P41436.1), Apoptosis 1 inhibitor (Inhibitor of apoptosis 1) (dIAP1) (Thread protein) BIR2 (U: Q24306), E3 ubiquitin-protein ligase XIAP BIR2 (U: P98170.2), Baculoviral IAP repeat-containing protein 3 BIR1 (U: Q13489.2), Apoptosis inhibitor 1 BIR1 (U: P41435.1), Death-associated inhibitor of apoptosis 2 BIR2 (U: Q24307.3), Apoptosis inhibitor 193R BIR1 (U: P47732.2), E3 ubiquitin-protein ligase XIAP BIR3 (U: P98170.2), Baculoviral IAP repeat-containing protein 3 BIR2 (U: Q13489.2), *S. cerevisiae* BIR1 BIR1 (U: P47134.1), IAP-like protein p27 BIR1 (U: P68763.1), Apoptosis inhibitor 1 BIR2 (U: P41435.1). **b)** Crystal structure of the canonical BIR1 domain of human neuronal apoptosis inhibitory protein (PDB: 2VM5). **c)** Crystal structure of BIR domain of human Survivin (PDB: 3UED). **d)** Crystal structure of the BIR1 domain of *D. melanogaster* IAP1-BIR1 (PDB: 3SIP). **e)** Superimposition of these structures.

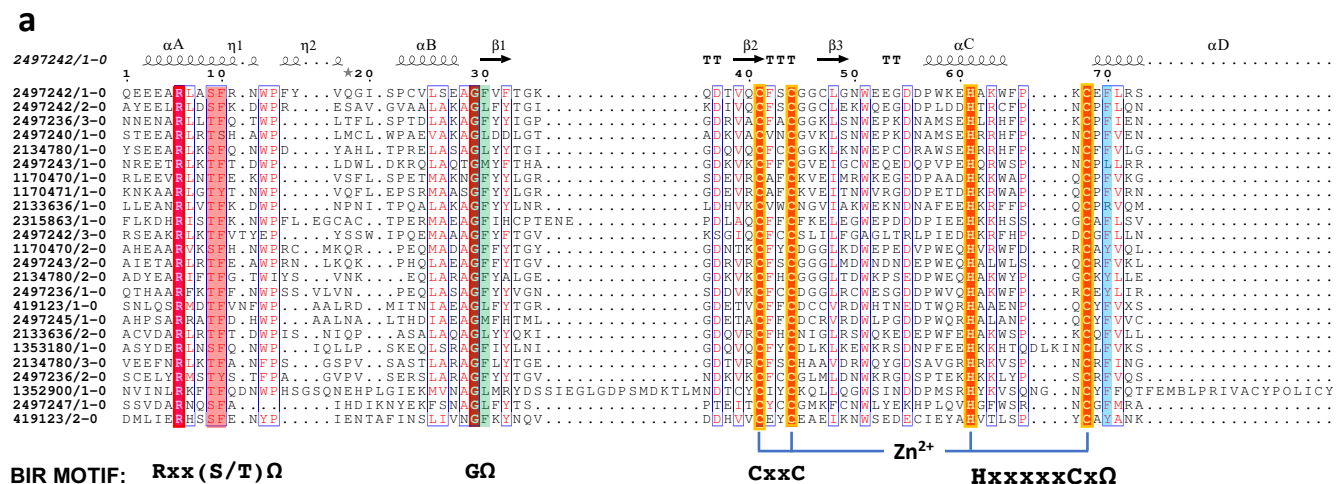

**Figure S2. Sequence and structure alignment of canonical BIR domains. (continued)**

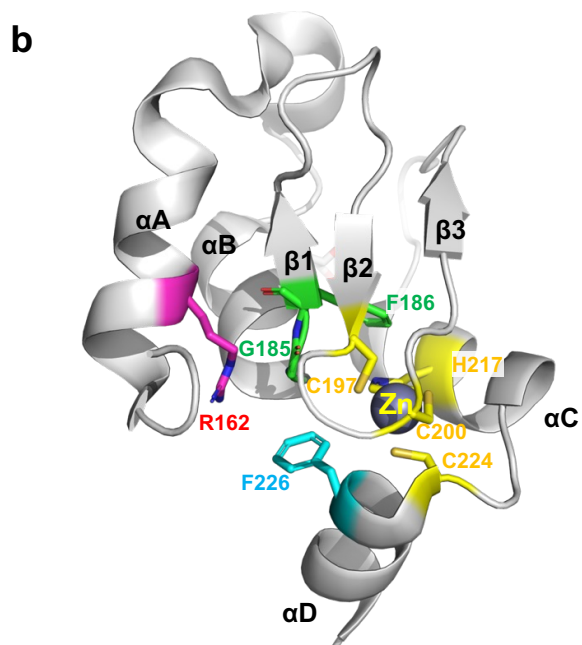

BIR domain of *Hs* neuronal apoptosis inhibitory protein (PDB: 2VM5)

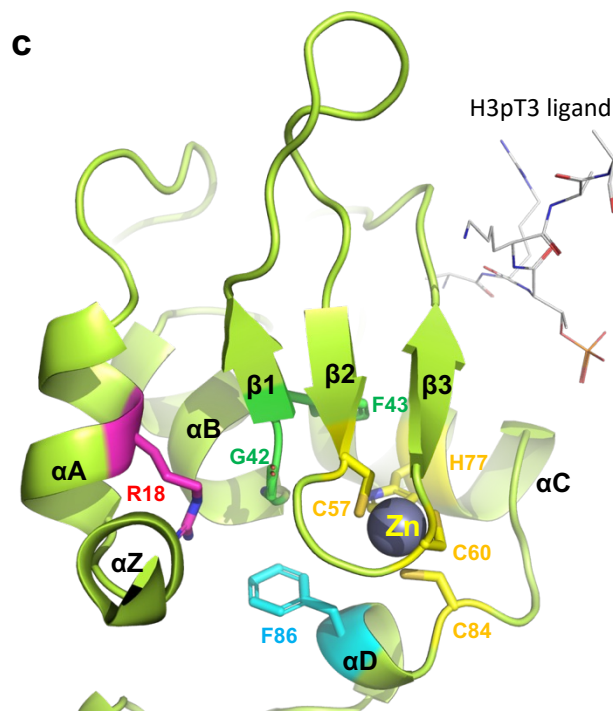

BIR domain of *Hs* Survivin (PDB: 3UED)

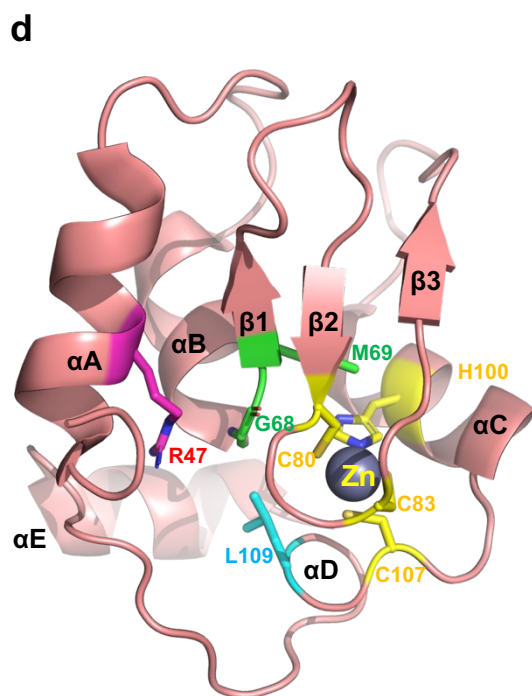

BIR domain of *Dm* IAP1-BIR1 (PDB: 3SIP)

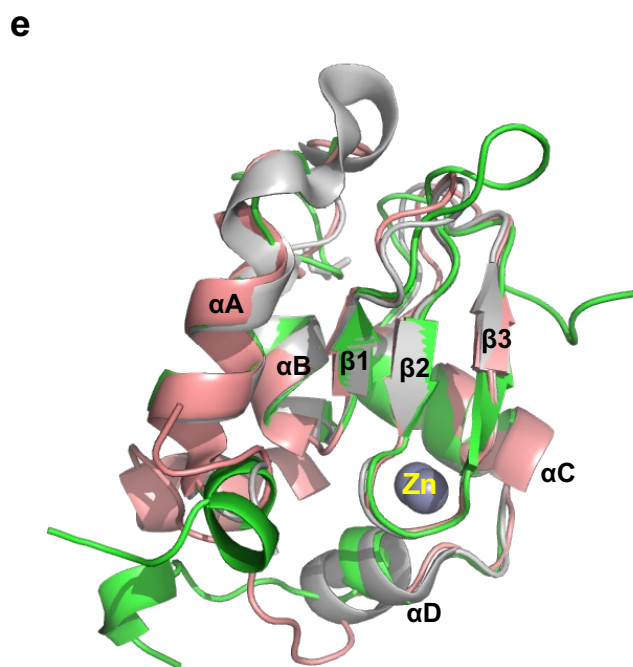

PDB: 2VM5  
PDB: 3UED  
PDB: 3SIP



### Figure S3. Consensus sequences of BIR-like domains.

Hidden Markov model of the **a)** canonical BIR domain, **b)** zf-C3HC domain, and **c)** Rsm1 domain.

#### a Canonical BIR domain

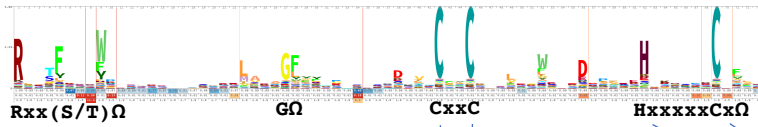

#### b zf-C3HC domain

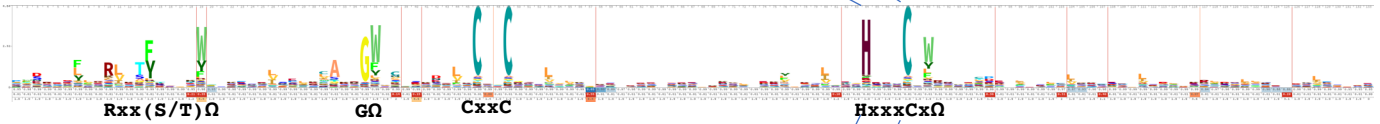

#### c Rsm1 domain

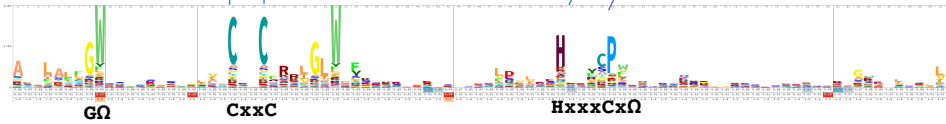

**Figure S4. Full gel and immunoblot related to Figure 1.**

**a)** Full gel of cropped gel displayed in Fig. 1a indicated by the red box. **b)** Full immunoblot of the cropped blot displayed in Fig. 1b indicated by the red box.

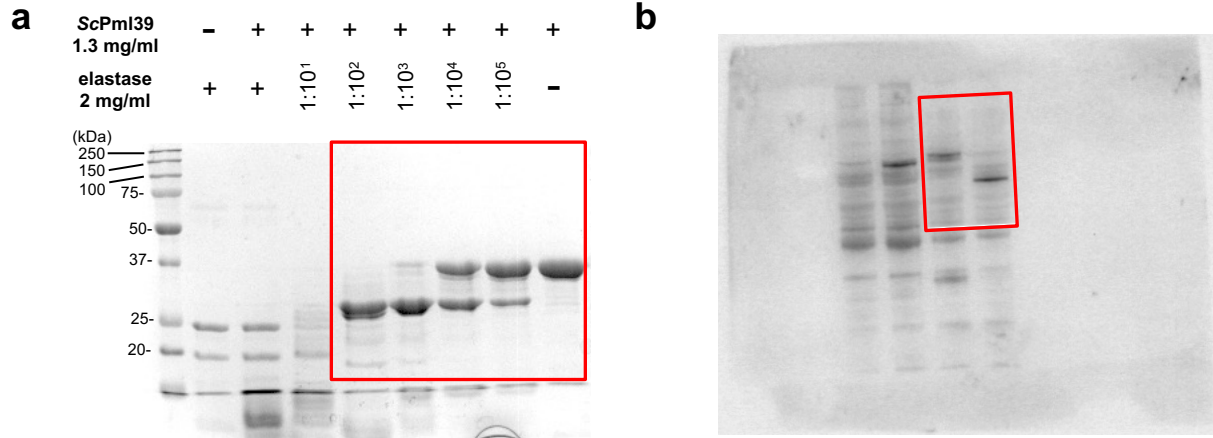

**Figure S5. Anomalous Zn difference map of ScPml39<sub>77-317</sub> contoured in a red mesh at 10 $\sigma$ .**

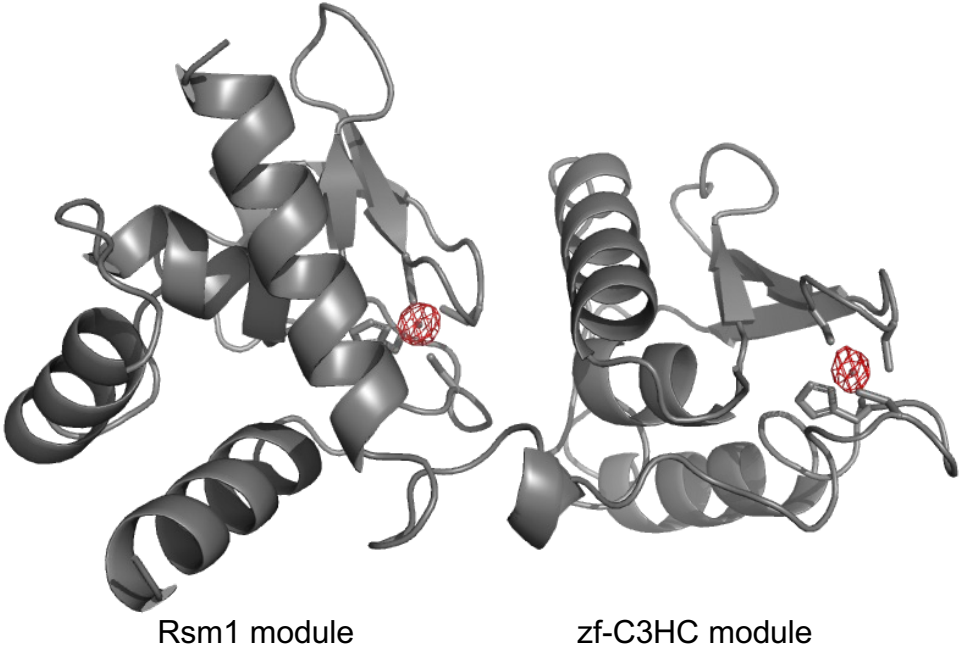

**Figure S6. Topology of ScPml39 (PDB: 7RDN) and the BIR1 domain of *D. melanogaster* IAP1-BIR1 (PDB: 3SIP).**

**a**

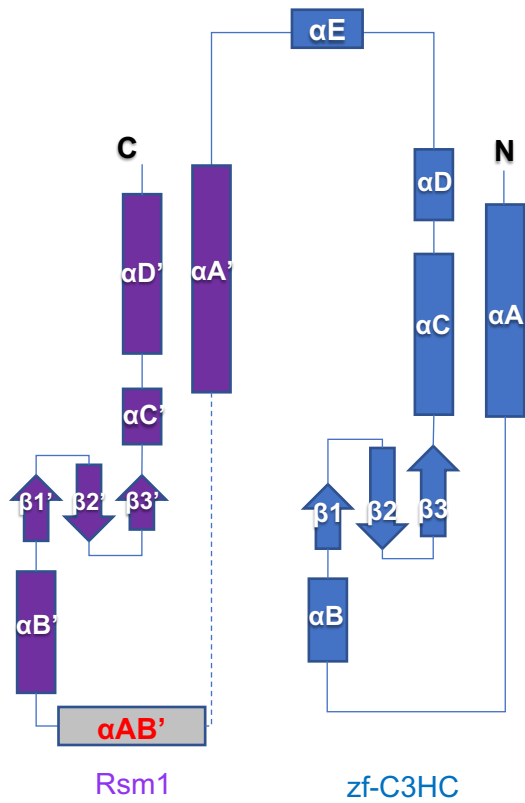

ScPml39  
This study (PDB: 7RDN)

**b**

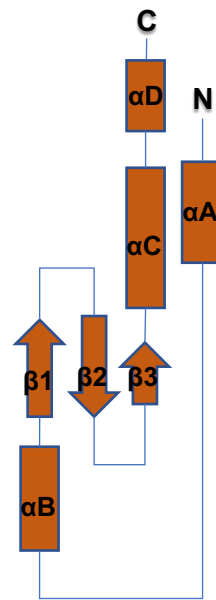

BIR1 domain of *Drosophila* IAP1-BIR1  
(PDB: 3SIP)



**Figure S7. AlphaFold2 models of a) *Sp*Rsm1** (UniProt accession code: O94506, <https://alphafold.ebi.ac.uk/entry/O94506>) and **b) *Hs*NIPA/ZC3HC1**, splice variant 1 (Q86WB0-1, <https://alphafold.ebi.ac.uk/entry/Q86WB0>). Long *Hs*NIPA/ZC3HC1 loops are omitted for clarity.

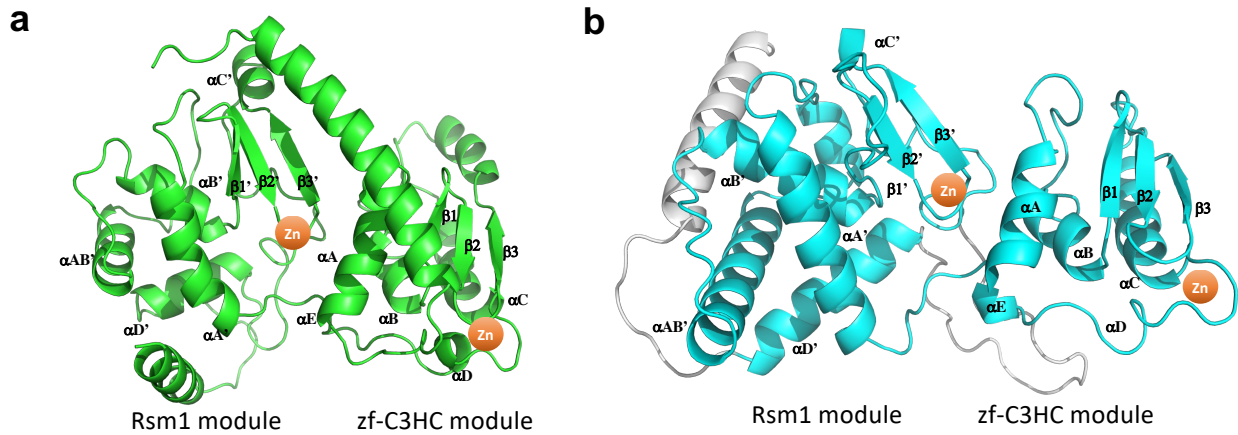

**Figure S8. Expression of *Schizosaccharomyces pombe* Rsm1 in *S. cerevisiae*.**

**a)** *SpRsm1* does not localize at the nuclear periphery when expressed in budding yeast. *S. cerevisiae pml39Δ* cells carrying an empty vector (“no GFP”) or expressing GFP-tagged Rsm1 under the control of the *PML39* promoter (top panel) were imaged as in Fig. 1. Single-plane images are shown for the GFP and DIC (differential interference contrast) channels. Scale bar, 5 μm. **b)** *SpRsm1* does not complement the *pml39Δ nup133Δ* synthetic interaction in the growth assay. Cells of the indicated genotypes were spotted as serial dilutions on SC medium and grown for 3 days at 25°C (same spotting as in Fig. 1d).

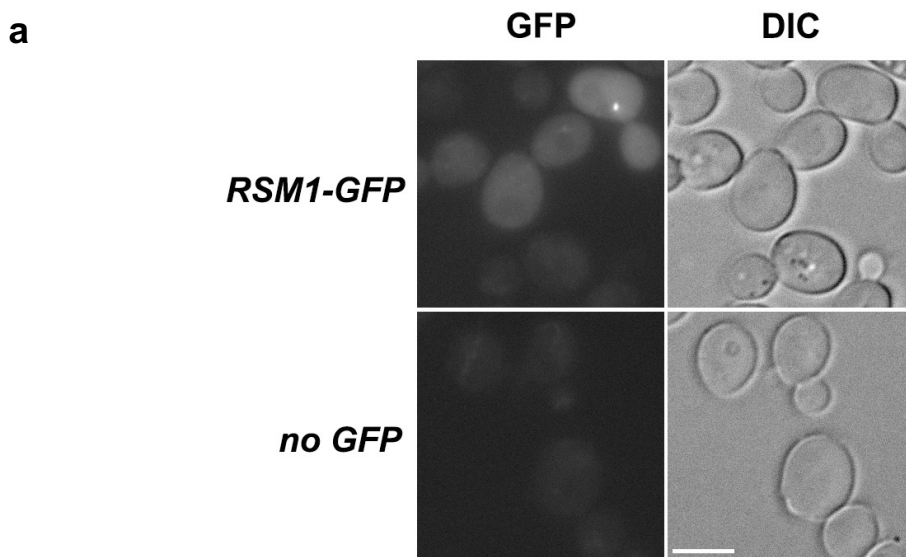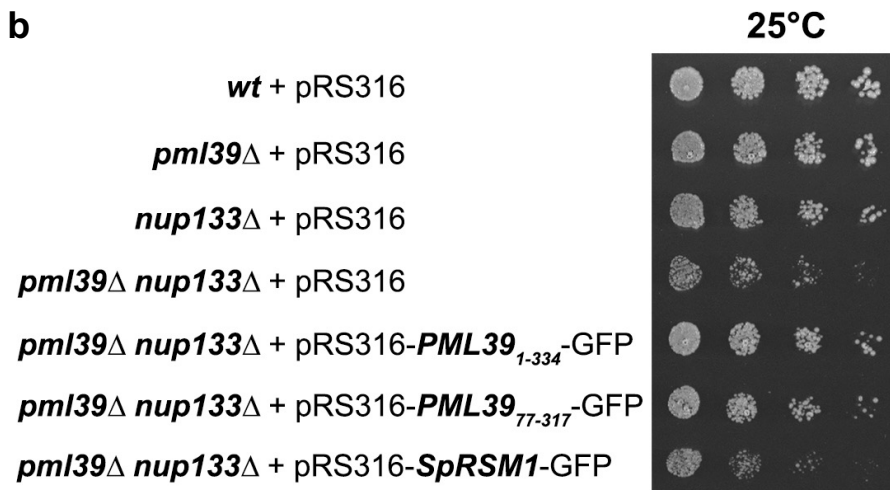

**Figure S9. Sequence alignment among N-terminal *S. cerevisiae* Mlp1, *S. cerevisiae* Mlp2, and *S. pombe* nup211 (*SpMlp*) regions.**

ScPml39 interacts with dimeric ScMlp1<sub>1-325</sub> *in vitro*. UniProt accession codes: Q02455 (ScMlp1), P40457 (ScMlp2), and O74424 (*SpNup211*, referred to as *SpMlp* here).

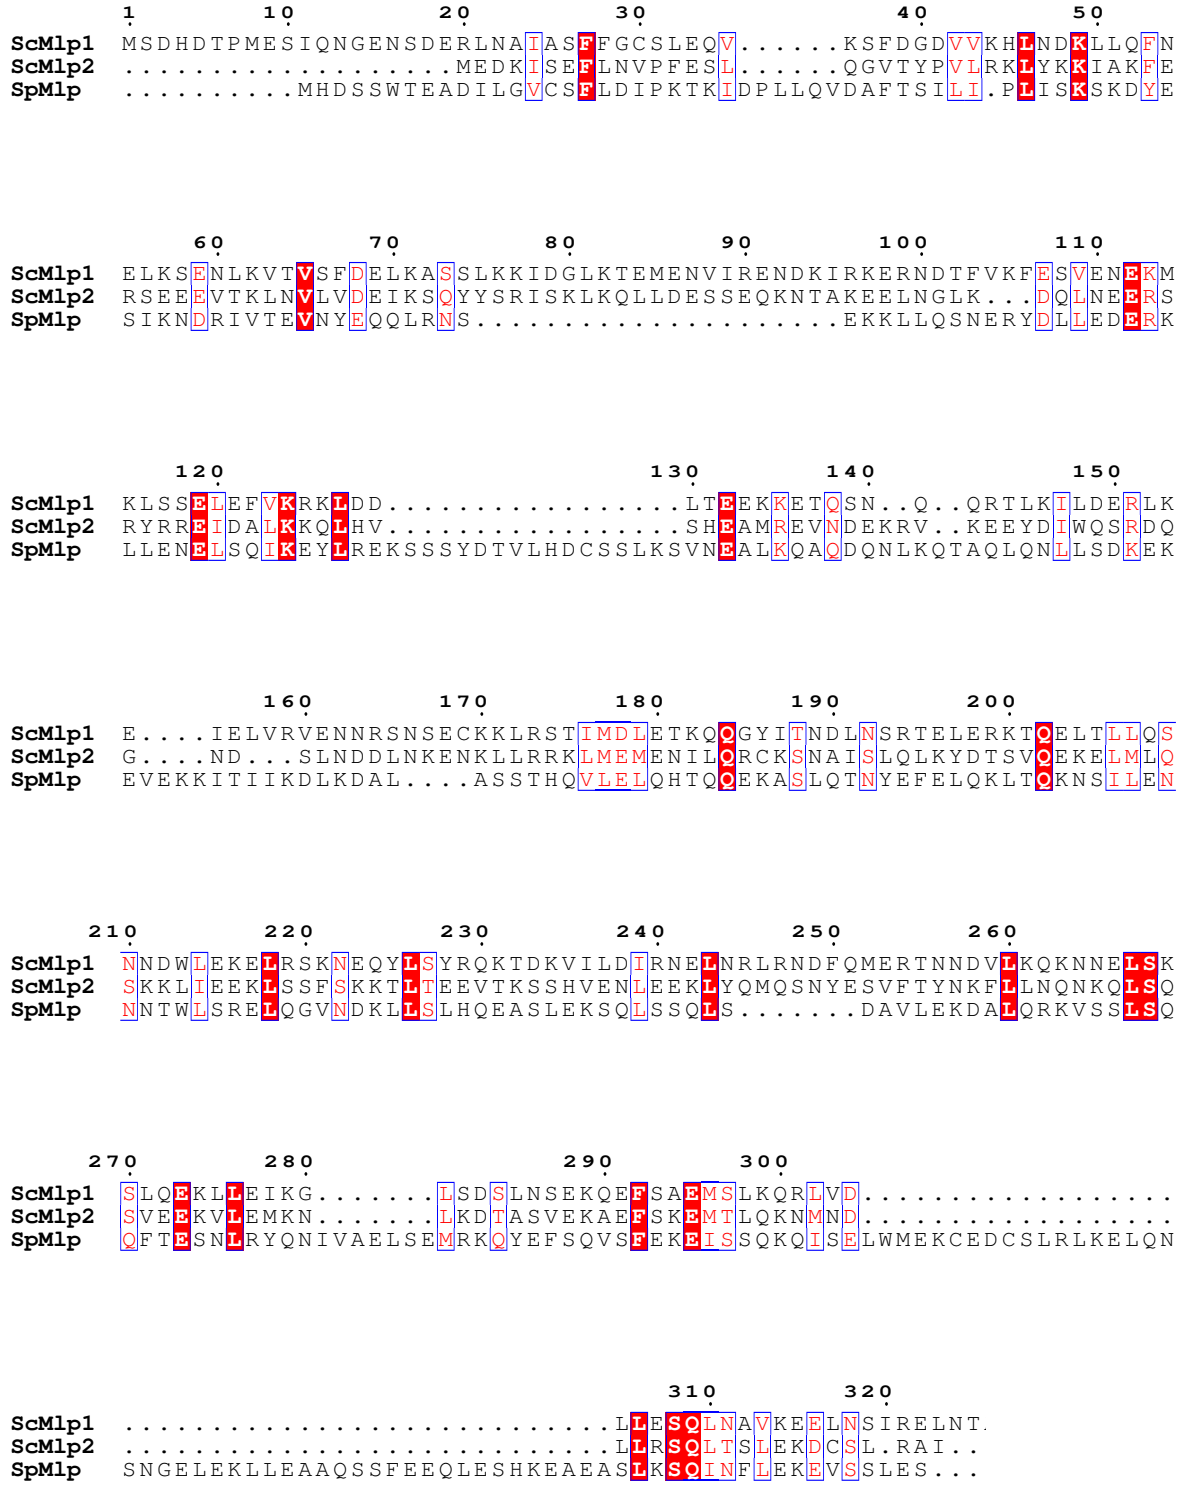

**Table S1. Yeast Strains used in this study.**

| <b>Strain code</b> | <b>Name</b>                                               | <b>Relevant genotype</b>                                                                                                          | <b>Origin</b> |
|--------------------|-----------------------------------------------------------|-----------------------------------------------------------------------------------------------------------------------------------|---------------|
| BY4742             | WT                                                        | <i>MAT<math>\alpha</math> his3<math>\Delta</math>1 leu2<math>\Delta</math>0 lys2<math>\Delta</math>0 ura3<math>\Delta</math>0</i> | Euroscarf     |
| Y16507             | <i>pml39<math>\Delta</math></i>                           | <i>(BY4742) pml39::KanMX</i>                                                                                                      | Euroscarf     |
| Y15998             | <i>nup133<math>\Delta</math></i>                          | <i>(BY4742) nup133::KanMX</i>                                                                                                     | Euroscarf     |
| yBP2314            | <i>pml39<math>\Delta</math> nup133<math>\Delta</math></i> | <i>(BY4742) pml39::KanMX nup133::LYS2</i>                                                                                         | This study    |
